# Supplementary material for: Antiviral Activity of Beebread, Bee-Collected Pollen and Artificially Fermented Follen against Influenza A Virus
Source: MDPI journal article supplement (doi:10.3390/foods12101978), 2023-05-13
Supplement: s1 [file s1]

## S.1. NMR Spectra of 1-BB, 4-BB and 6P-BCP fractions

### S.1.1. NMR Spectra of 1-BB

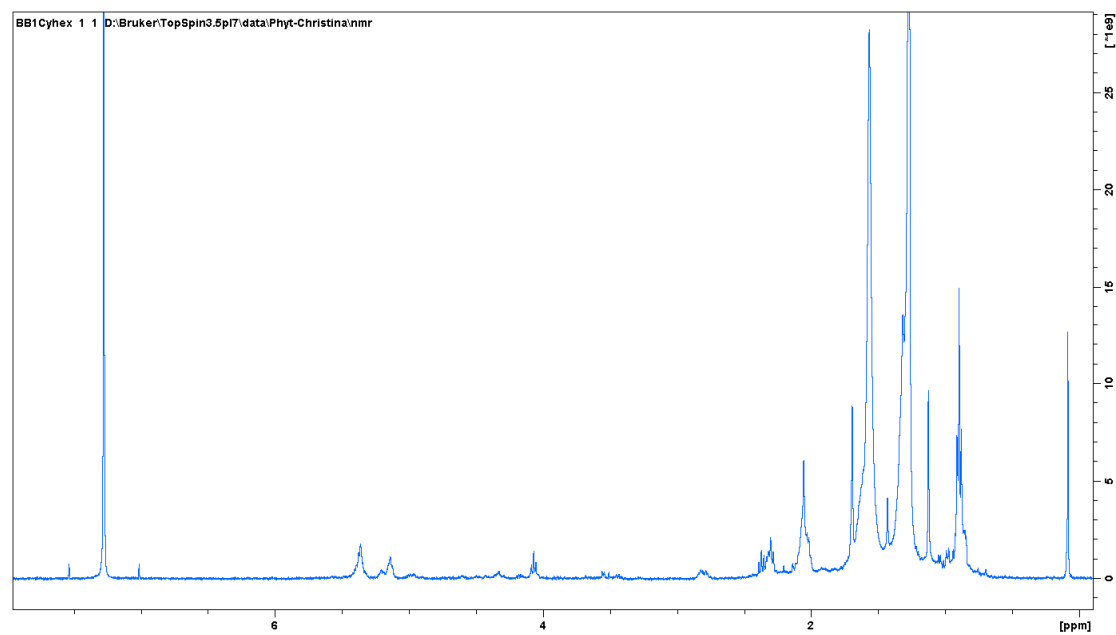

**Figure S1.** <sup>1</sup>H NMR (400 MHz, CDCl<sub>3</sub>) spectrum of 1-BB-Et.

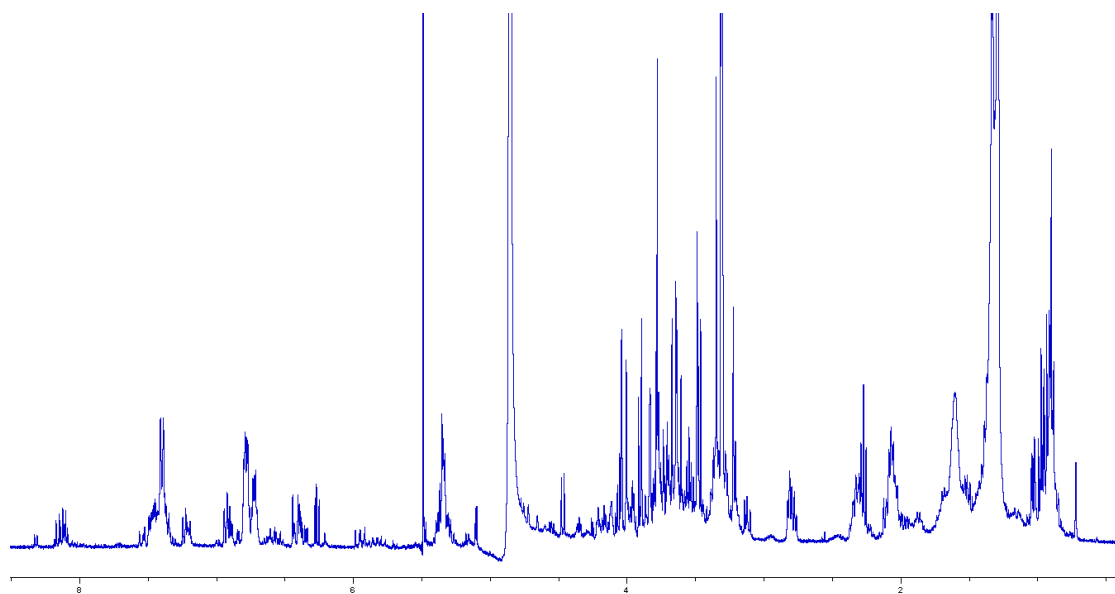

**Figure S2.** <sup>1</sup>H NMR (400 MHz, MeOD) spectrum of 1-BB-Bu.

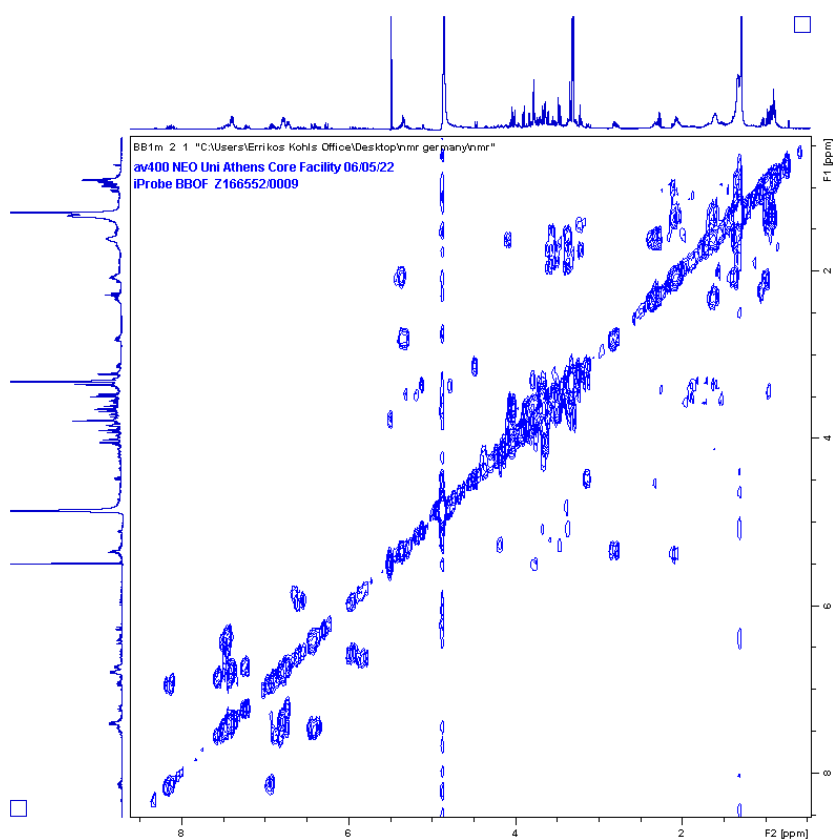

**Figure S3.**  $^1\text{H}$ - $^1\text{H}$  COSY (400 MHz, MeOD) spectrum of 1-BB-Bu.

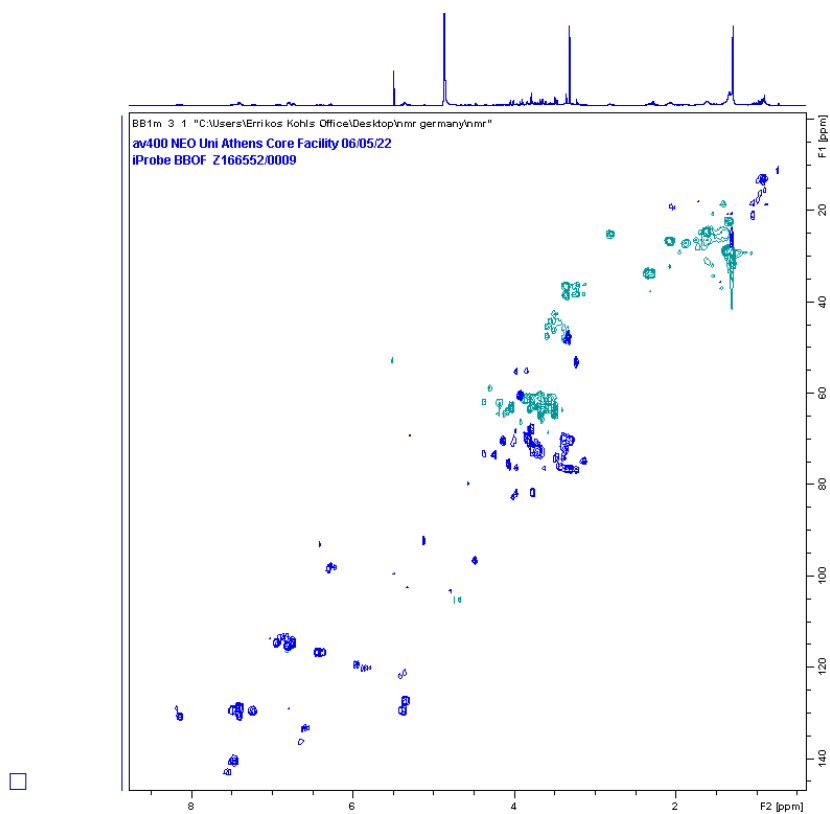

**Figure S4.** HSQC NMR (400 MHz, MeOD) spectrum 1-BB-Bu.

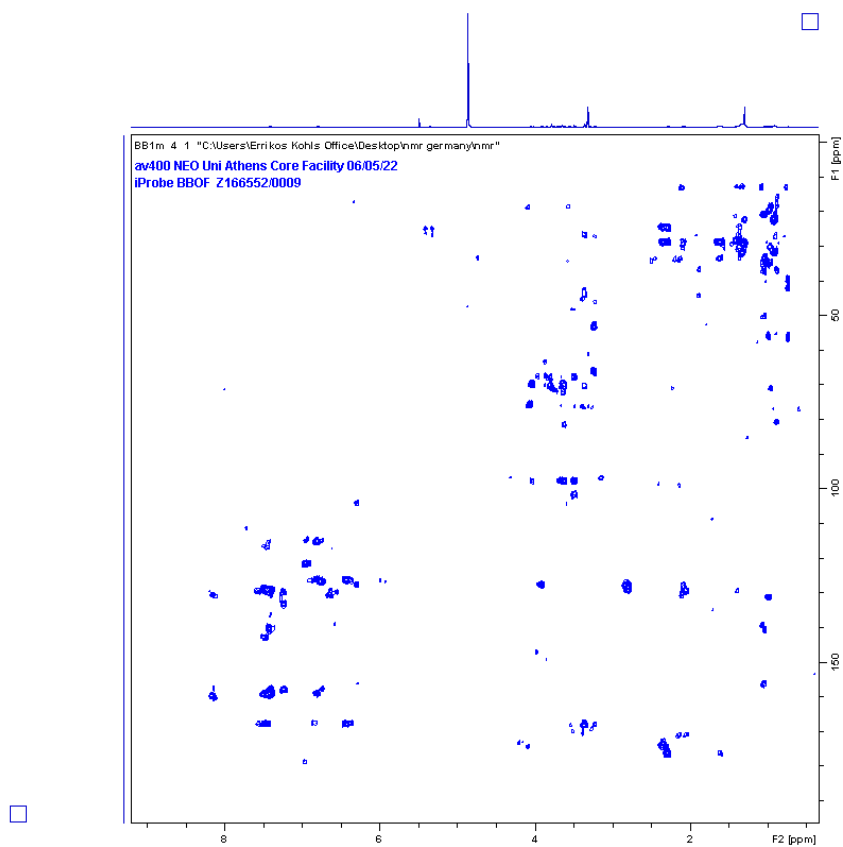

**Figure S5.** HMBC NMR (400 MHz, MeOD) spectrum 1-BB-Bu.

### S.1.2. NMR spectra of 4-BB

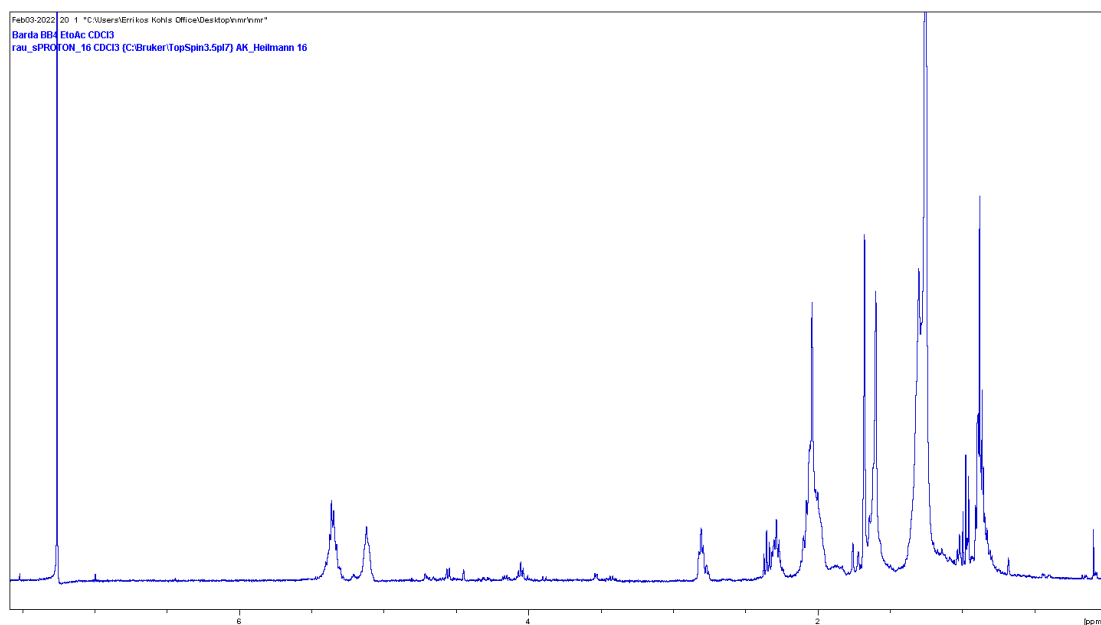

**Figure S6.**  $^1\text{H}$  NMR ( $\text{CDCl}_3$ ) spectrum 4-BB-Et.

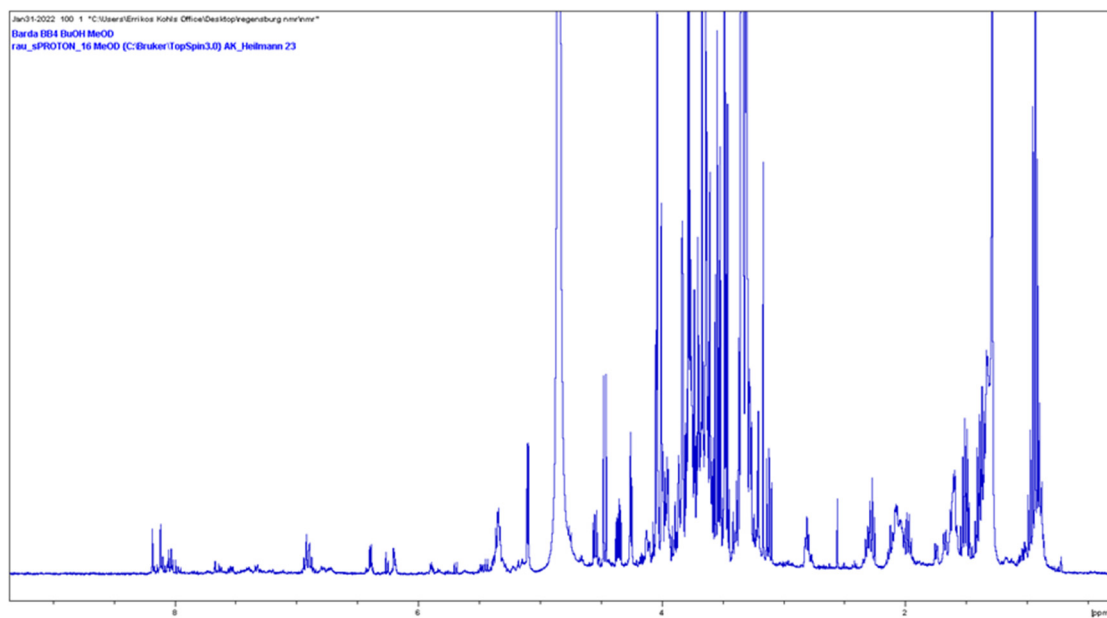

**Figure S7.**  $^1\text{H}$  NMR ( $\text{MeOD}$ ) spectrum 4-BB-Bu.

### S.1.3. NMR spectra of 6P-BCP

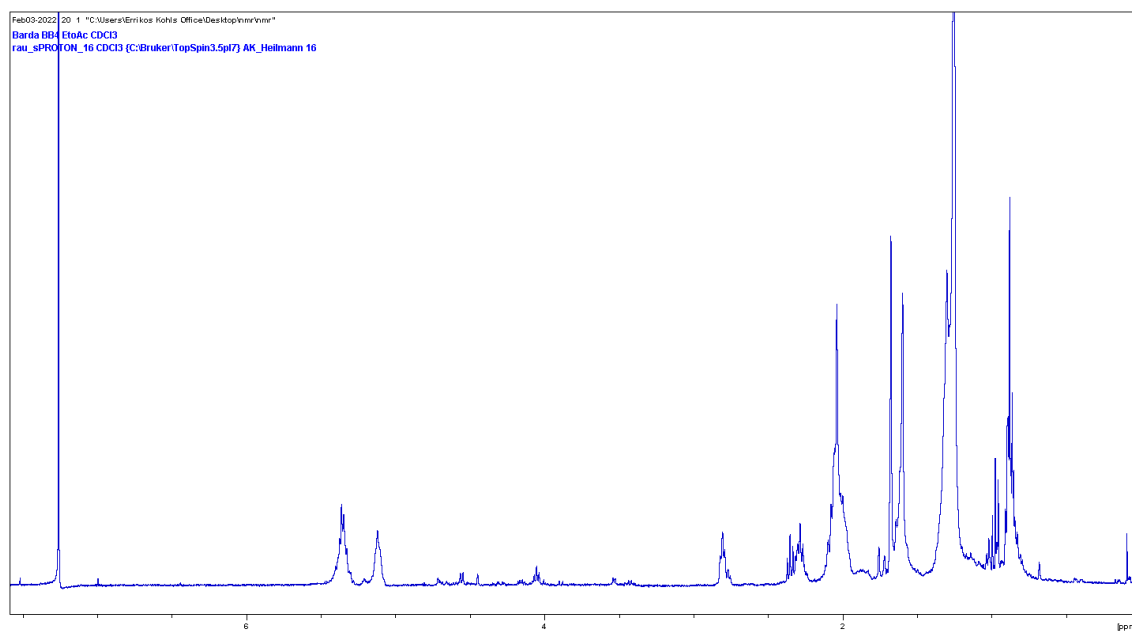

**Figure S8.** <sup>1</sup>H NMR (600 MHz, CDCl<sub>3</sub>) of 6P-BCP-Et.

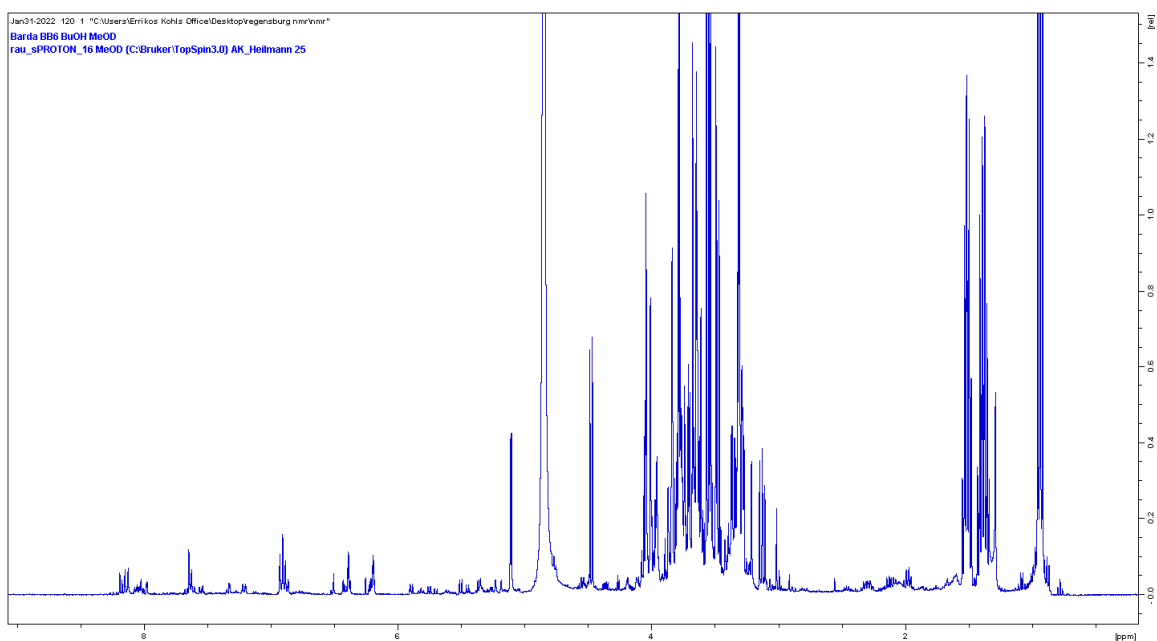

**Figure S9.** <sup>1</sup>H NMR (600 MHz, MeOD) of 6P-BCP-Bu.

S.2. LC-MS chromatograms of 1-BB-Bu, 4-BB-Bu and 6P-BCP-Bu

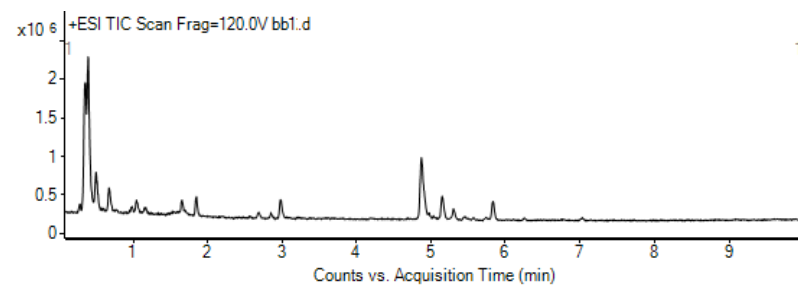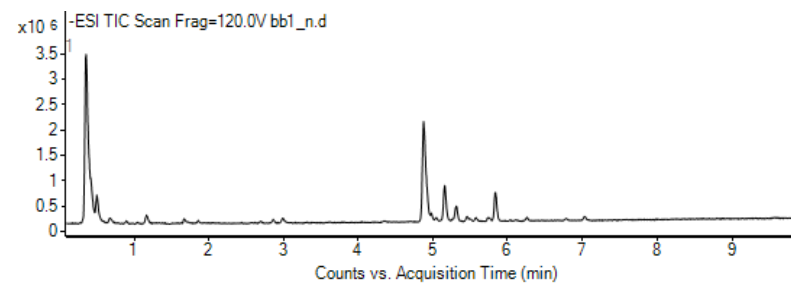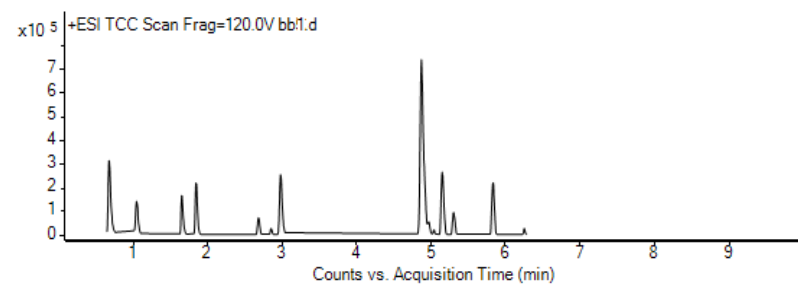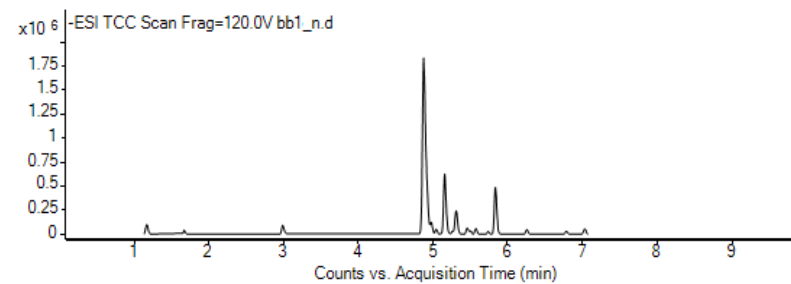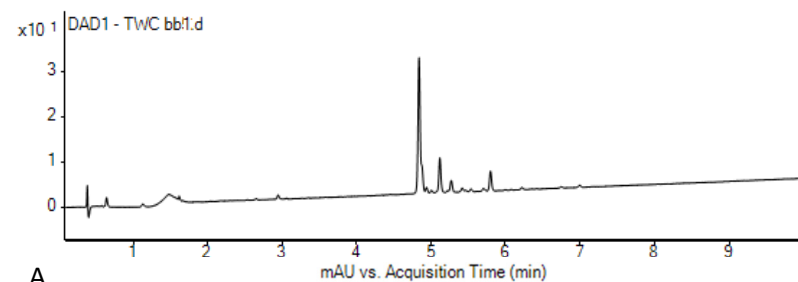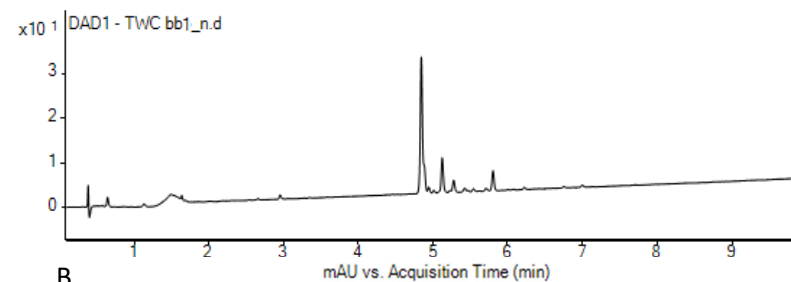

**Figure S10.** LC-ESI-MS of 1-BB-Bu extract in positive (A) and negative (B) ion modes.

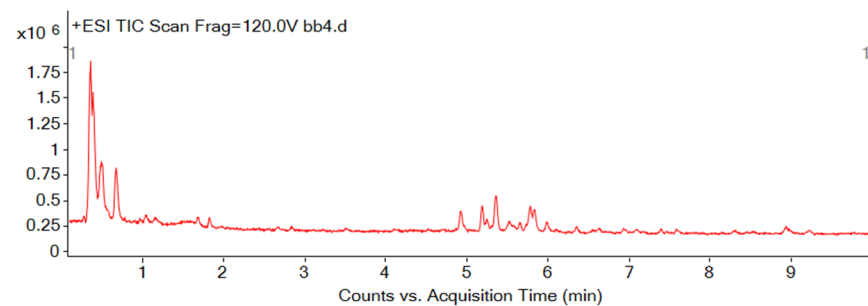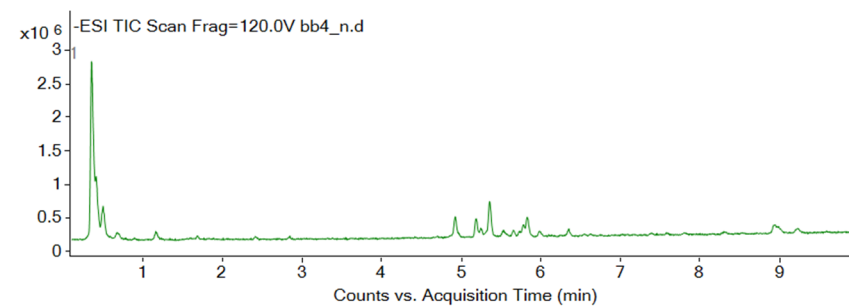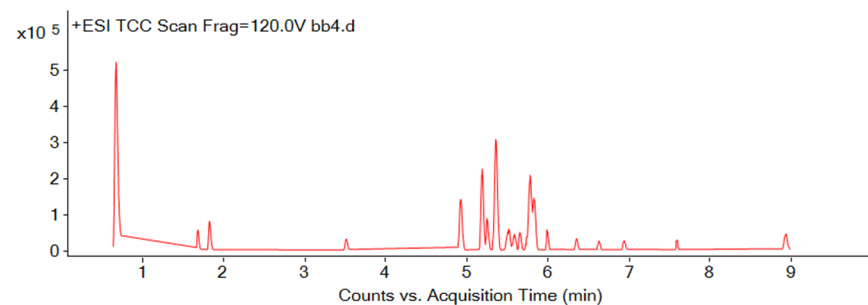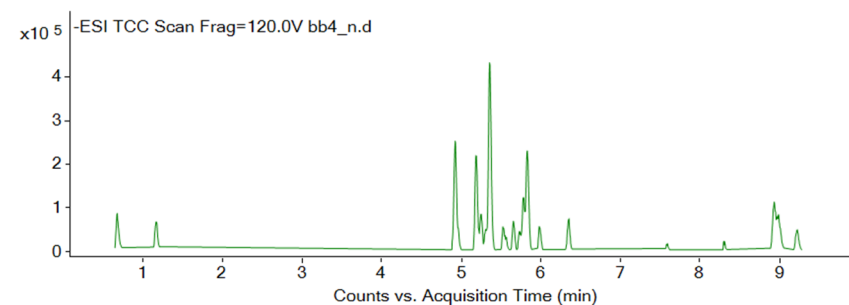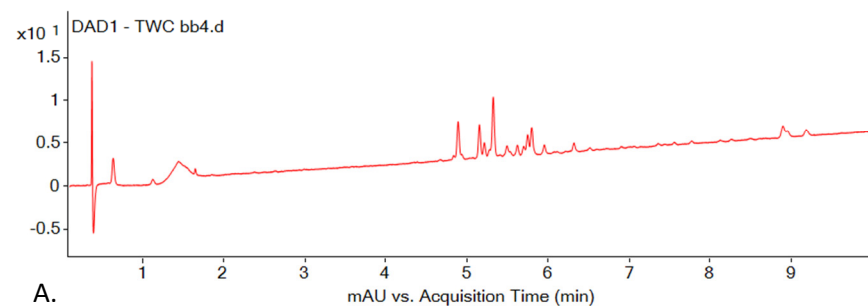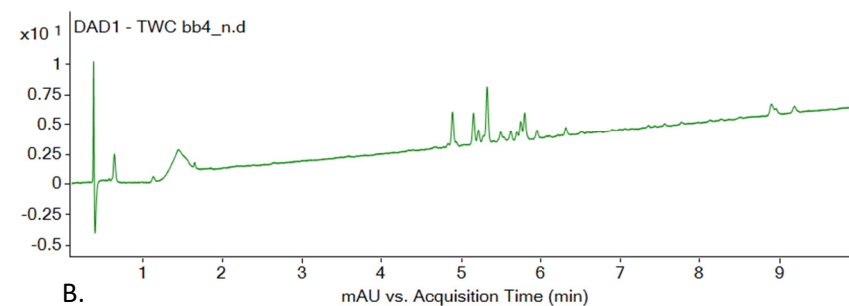

**Figure S11.** LC-ESI-MS of 4-BB-Bu extract in positive (A) and negative (B) ion modes.

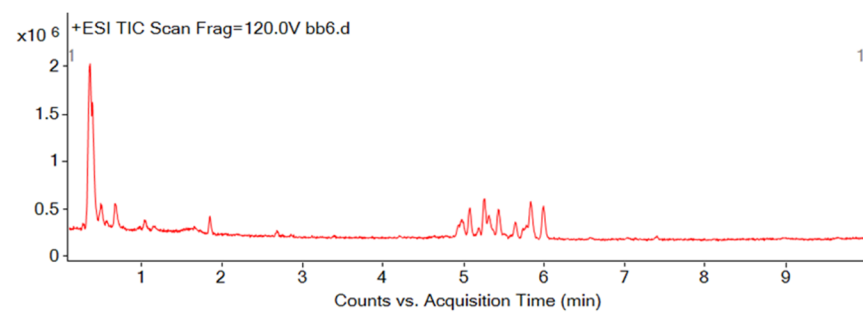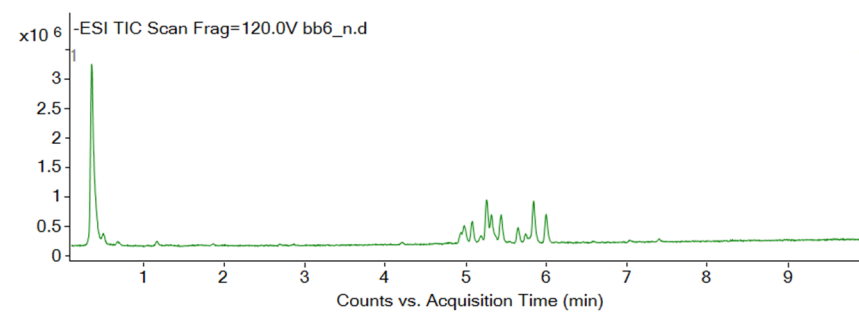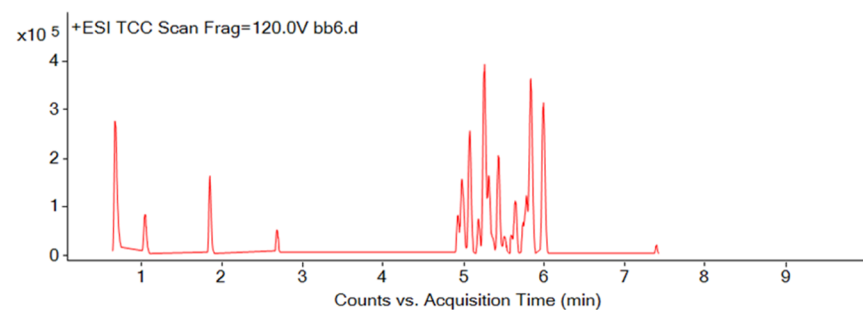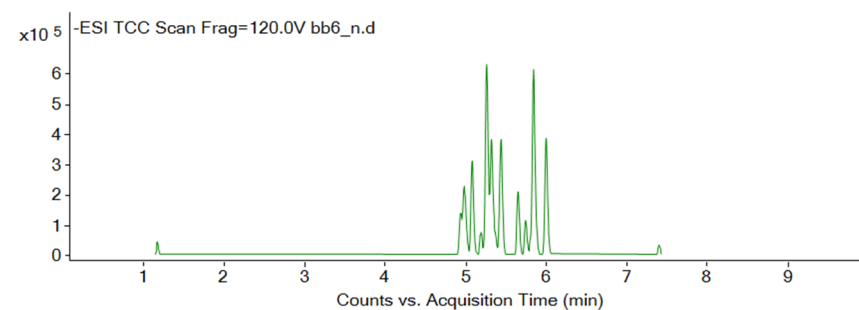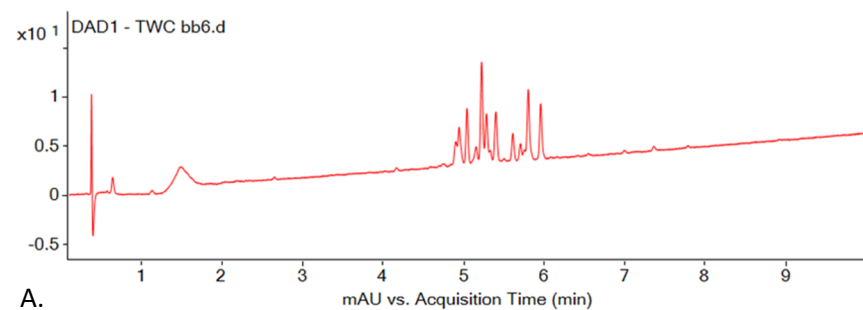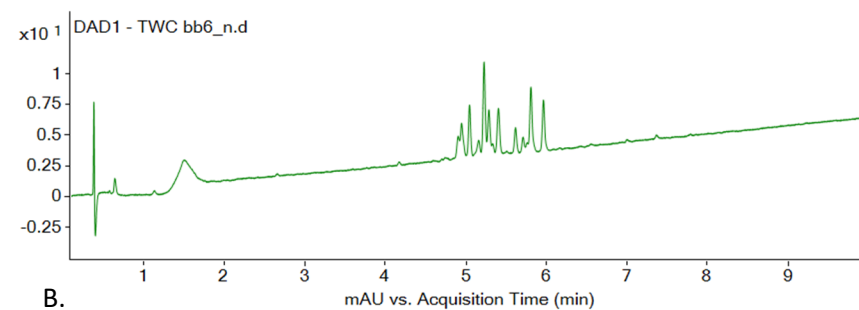

**Figure S12.** LC-ESI-MS of 6P-BCP-Bu extract in positive (A) and negative (B) ion modes.



*S.3. GC-MS chromatograms of the fractions 1-BB-Et, 4-BB-Et and 6P-BCP-Et*

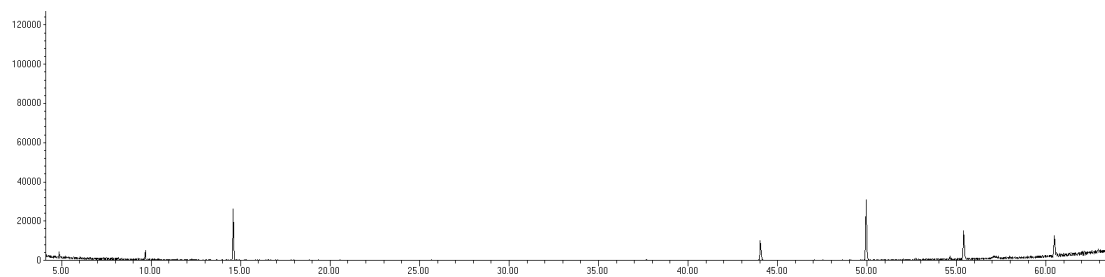

**Figure S13.** GC-MS chromatogram of 1-BB-Et.

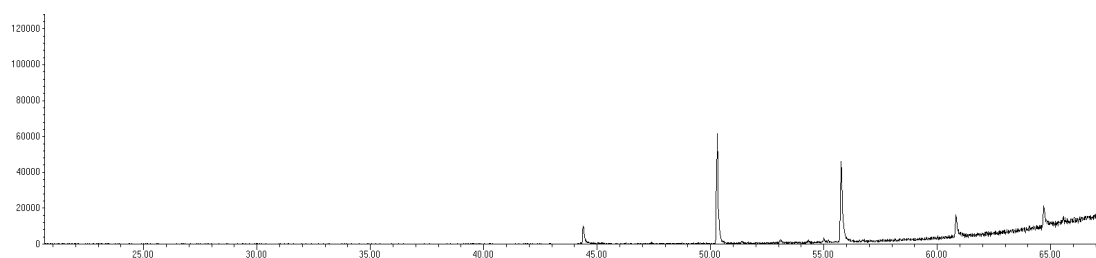

**Figure S14.** GC-MS chromatogram of 4-BB-Et.

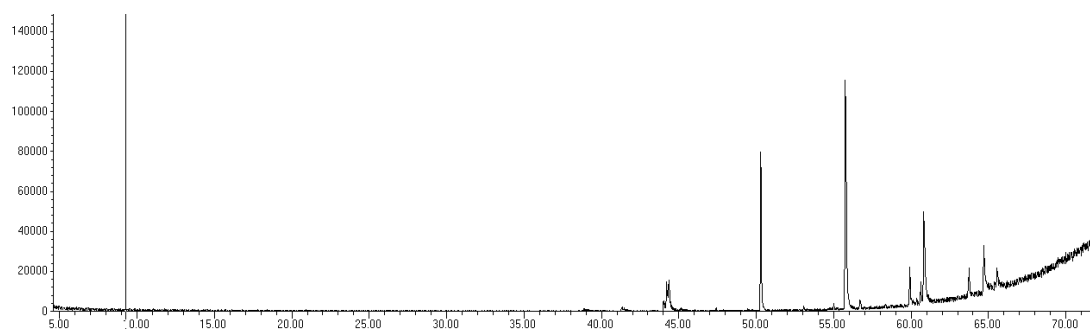

**Figure S15.** GC-MS chromatogram of 6P-BCP-Et.
